# Supplementary material
Source: publisher figshare collection journal article supplement (https://acs.figshare.com/ndownloader/files/4766536)
Supplement: Supplementary file 1 [file 4766536]

 
data_dt0992m 
 
_audit_creation_method            SHELXL-97 
_chemical_name_systematic 
; 
 ? 
; 
_chemical_name_common             ? 
_chemical_melting_point           ? 
_chemical_formula_moiety          ? 
_chemical_formula_sum 
 'C21 H21 N O2' 
_chemical_formula_weight          319.39 
 
loop_ 
 _atom_type_symbol 
 _atom_type_description 
 _atom_type_scat_dispersion_real 
 _atom_type_scat_dispersion_imag 
 _atom_type_scat_source 
 'C'  'C'   0.0033   0.0016 
 'International Tables Vol C Tables 4.2.6.8 and 6.1.1.4' 
 'H'  'H'   0.0000   0.0000 
 'International Tables Vol C Tables 4.2.6.8 and 6.1.1.4' 
 'N'  'N'   0.0061   0.0033 
 'International Tables Vol C Tables 4.2.6.8 and 6.1.1.4' 
 'O'  'O'   0.0106   0.0060 
 'International Tables Vol C Tables 4.2.6.8 and 6.1.1.4' 
 
_symmetry_cell_setting            'MONOCLINIC'  
_symmetry_space_group_name_H-M    'P 2(1)/C' 
 
loop_ 
 _symmetry_equiv_pos_as_xyz 
 'x, y, z' 
 '-x, y+1/2, -z+1/2' 
 '-x, -y, -z' 
 'x, -y-1/2, z-1/2' 
 
_cell_length_a                    10.5943(8) 
_cell_length_b                    8.9347(7) 
_cell_length_c                    19.0320(15) 
_cell_angle_alpha                 90.00 
_cell_angle_beta                  102.6070(10) 
_cell_angle_gamma                 90.00 
_cell_volume                      1758.1(2) 
_cell_formula_units_Z             4 
_cell_measurement_temperature     293(2) 
_cell_measurement_reflns_used     ? 
_cell_measurement_theta_min       ? 
_cell_measurement_theta_max       ? 
 
_exptl_crystal_description        PLATE 
_exptl_crystal_colour             COLOURLESS 
_exptl_crystal_size_max           0.47  
_exptl_crystal_size_mid           0.33   
_exptl_crystal_size_min           0.18  
_exptl_crystal_density_meas       ? 
_exptl_crystal_density_diffrn     1.207 
_exptl_crystal_density_method     'not measured' 
_exptl_crystal_F_000              680 
_exptl_absorpt_coefficient_mu     0.077 
_exptl_absorpt_correction_type    'SADABS' 
_exptl_absorpt_correction_T_min   ? 
_exptl_absorpt_correction_T_max   ? 
_exptl_absorpt_process_details    ? 
 
_exptl_special_details 
; 
 ? 
; 
 
_diffrn_ambient_temperature       293(2) 
_diffrn_radiation_wavelength      0.71073 
_diffrn_radiation_type            MoK\a 
_diffrn_radiation_source          'fine-focus sealed tube' 
_diffrn_radiation_monochromator   graphite 
_diffrn_measurement_device_type   'BRUKER SMART CCD AREA DETECTOR' 
_diffrn_measurement_method        'PHI-OMEGA' 
_diffrn_detector_area_resol_mean  0.3  
_diffrn_standards_number          ? 
_diffrn_standards_interval_count  ? 
_diffrn_standards_interval_time   ? 
_diffrn_standards_decay_%         <10  
_diffrn_reflns_number             6680 
_diffrn_reflns_av_R_equivalents   0.0148 
_diffrn_reflns_av_sigmaI/netI     0.0155 
_diffrn_reflns_limit_h_min        -11 
_diffrn_reflns_limit_h_max        11 
_diffrn_reflns_limit_k_min        -9 
_diffrn_reflns_limit_k_max        9 
_diffrn_reflns_limit_l_min        -20 
_diffrn_reflns_limit_l_max        19 
_diffrn_reflns_theta_min          1.97 
_diffrn_reflns_theta_max          22.50 
_reflns_number_total              2303 
_reflns_number_gt                 2144 
_reflns_threshold_expression      >2sigma(I) 
 
_computing_data_collection        'BRUKER AXS SMART 3' 
_computing_cell_refinement        'BRUKER AXS SMART 3' 
_computing_data_reduction         'BRUKER AXS SMART 3' 
_computing_structure_solution     'SHELXS-97 (Sheldrick, 1990)' 
_computing_structure_refinement   'SHELXL-97 (Sheldrick, 1997)' 
_computing_molecular_graphics     'PLATON; 'MERCURY 1.2' 
_computing_publication_material   ? 
 
_refine_special_details 
; 
 Refinement of F^2^ against ALL reflections.  The weighted R-factor wR and 
 goodness of fit S are based on F^2^, conventional R-factors R are based 
 on F, with F set to zero for negative F^2^. The threshold expression of 
 F^2^ > 2sigma(F^2^) is used only for calculating R-factors(gt) etc. and is 
 not relevant to the choice of reflections for refinement.  R-factors based 
 on F^2^ are statistically about twice as large as those based on F, and R- 
 factors based on ALL data will be even larger. 
; 
 
_refine_ls_structure_factor_coef  Fsqd  
_refine_ls_matrix_type            full 
_refine_ls_weighting_scheme       calc  
_refine_ls_weighting_details 
 'calc w=1/[\s^2^(Fo^2^)+(0.0511P)^2^+0.4056P] where P=(Fo^2^+2Fc^2^)/3' 
_atom_sites_solution_primary      direct 
_atom_sites_solution_secondary    difmap 
_atom_sites_solution_hydrogens    geom 
_refine_ls_hydrogen_treatment     mixed 
_refine_ls_extinction_method      none 
_refine_ls_extinction_coef        ? 
_refine_ls_number_reflns          2303 
_refine_ls_number_parameters      301 
_refine_ls_number_restraints      0 
_refine_ls_R_factor_all           0.0322 
_refine_ls_R_factor_gt            0.0297 
_refine_ls_wR_factor_ref          0.0822 
_refine_ls_wR_factor_gt           0.0790 
_refine_ls_goodness_of_fit_ref    1.046 
_refine_ls_restrained_S_all       1.046 
_refine_ls_shift/su_max           0.000 
_refine_ls_shift/su_mean          0.000 
 
loop_ 
 _atom_site_label 
 _atom_site_type_symbol 
 _atom_site_fract_x 
 _atom_site_fract_y 
 _atom_site_fract_z 
 _atom_site_U_iso_or_equiv 
 _atom_site_adp_type 
 _atom_site_occupancy 
 _atom_site_symmetry_multiplicity 
 _atom_site_calc_flag 
 _atom_site_refinement_flags 
 _atom_site_disorder_assembly 
 _atom_site_disorder_group 
O1 O 0.57200(8) 0.53528(10) 0.18132(5) 0.0287(2) Uani 1 1 d . . . 
O2 O 0.64853(8) 0.75515(10) 0.22741(5) 0.0293(3) Uani 1 1 d . . . 
N1 N 0.43035(10) 0.54835(12) 0.28012(6) 0.0237(3) Uani 1 1 d . . . 
C2 C 0.68780(12) 0.68261(14) 0.11332(7) 0.0255(3) Uani 1 1 d . . . 
C1 C 0.63214(12) 0.65693(14) 0.17873(7) 0.0242(3) Uani 1 1 d . . . 
C3 C 0.77378(13) 0.79943(16) 0.11109(8) 0.0329(3) Uani 1 1 d . . . 
C4 C 0.82136(14) 0.82394(19) 0.04981(9) 0.0418(4) Uani 1 1 d . . . 
C5 C 0.78413(17) 0.73211(19) -0.00936(9) 0.0477(4) Uani 1 1 d . . . 
C6 C 0.69819(17) 0.61565(18) -0.00806(8) 0.0456(4) Uani 1 1 d . . . 
C7 C 0.65060(15) 0.59126(16) 0.05323(7) 0.0331(4) Uani 1 1 d . . . 
C9 C 0.71595(12) 0.48695(15) 0.36155(7) 0.0263(3) Uani 1 1 d . . . 
C10 C 0.81680(13) 0.39211(15) 0.39139(7) 0.0291(3) Uani 1 1 d . . . 
C11 C 0.80539(14) 0.29641(15) 0.44684(7) 0.0321(3) Uani 1 1 d . . . 
C14 C 0.60188(12) 0.48621(14) 0.38676(6) 0.0244(3) Uani 1 1 d . . . 
C12 C 0.69229(13) 0.29459(15) 0.47190(7) 0.0313(3) Uani 1 1 d . . . 
C13 C 0.59087(13) 0.38881(14) 0.44193(7) 0.0272(3) Uani 1 1 d . . . 
C15 C 0.49383(13) 0.59204(15) 0.35525(7) 0.0271(3) Uani 1 1 d . . . 
C16 C 0.33445(13) 0.66072(16) 0.24162(7) 0.0270(3) Uani 1 1 d . . . 
C17 C 0.21479(12) 0.67584(13) 0.27130(6) 0.0237(3) Uani 1 1 d . . . 
C18 C 0.10563(13) 0.59069(15) 0.24351(7) 0.0294(3) Uani 1 1 d . . . 
C20 C -0.00980(13) 0.70919(15) 0.32347(7) 0.0305(3) Uani 1 1 d . . . 
C19 C -0.00618(13) 0.60720(16) 0.26918(7) 0.0326(4) Uani 1 1 d . . . 
C21 C 0.09841(13) 0.79417(15) 0.35195(7) 0.0287(3) Uani 1 1 d . . . 
C22 C 0.20986(13) 0.77812(14) 0.32577(7) 0.0257(3) Uani 1 1 d . . . 
H1N1 H 0.4968(15) 0.5411(17) 0.2475(9) 0.041(4) Uiso 1 1 d . . . 
H1N2 H 0.3934(14) 0.4533(19) 0.2801(8) 0.036(4) Uiso 1 1 d . . . 
H3 H 0.8001(14) 0.8633(18) 0.1534(8) 0.037(4) Uiso 1 1 d . . . 
H5 H 0.8193(16) 0.7497(19) -0.0538(10) 0.055(5) Uiso 1 1 d . . . 
H4 H 0.8817(16) 0.907(2) 0.0496(9) 0.051(5) Uiso 1 1 d . . . 
H6 H 0.6681(16) 0.551(2) -0.0511(10) 0.057(5) Uiso 1 1 d . . . 
H7 H 0.5896(14) 0.5133(18) 0.0554(7) 0.036(4) Uiso 1 1 d . . . 
H9 H 0.7237(12) 0.5539(15) 0.3227(7) 0.024(3) Uiso 1 1 d . . . 
H10 H 0.8948(14) 0.3937(15) 0.3730(7) 0.032(4) Uiso 1 1 d . . . 
H11 H 0.8770(15) 0.2317(17) 0.4679(8) 0.036(4) Uiso 1 1 d . . . 
H12 H 0.6848(13) 0.2296(17) 0.5111(8) 0.035(4) Uiso 1 1 d . . . 
H13 H 0.5103(13) 0.3869(15) 0.4597(7) 0.026(3) Uiso 1 1 d . . . 
H15A H 0.4267(13) 0.5933(14) 0.3835(7) 0.023(3) Uiso 1 1 d . . . 
H15B H 0.5263(13) 0.6940(18) 0.3523(7) 0.032(4) Uiso 1 1 d . . . 
H16A H 0.3821(14) 0.7531(18) 0.2445(7) 0.031(4) Uiso 1 1 d . . . 
H16B H 0.3131(13) 0.6255(15) 0.1914(8) 0.029(3) Uiso 1 1 d . . . 
H18 H 0.1082(13) 0.5208(17) 0.2044(8) 0.033(4) Uiso 1 1 d . . . 
H19 H -0.0825(15) 0.5490(18) 0.2484(8) 0.042(4) Uiso 1 1 d . . . 
H20 H -0.0912(14) 0.7227(16) 0.3417(7) 0.035(4) Uiso 1 1 d . . . 
H21 H 0.0951(12) 0.8664(16) 0.3895(7) 0.029(3) Uiso 1 1 d . . . 
H22 H 0.2847(14) 0.8396(16) 0.3441(7) 0.030(3) Uiso 1 1 d . . . 
 
loop_ 
 _atom_site_aniso_label 
 _atom_site_aniso_U_11 
 _atom_site_aniso_U_22 
 _atom_site_aniso_U_33 
 _atom_site_aniso_U_23 
 _atom_site_aniso_U_13 
 _atom_site_aniso_U_12 
O1 0.0327(5) 0.0212(5) 0.0347(5) -0.0014(4) 0.0128(4) -0.0002(4) 
O2 0.0365(5) 0.0219(5) 0.0296(5) -0.0018(4) 0.0071(4) 0.0032(4) 
N1 0.0241(6) 0.0197(6) 0.0277(6) 0.0013(4) 0.0061(5) 0.0001(5) 
C2 0.0249(7) 0.0219(7) 0.0299(7) 0.0054(5) 0.0060(5) 0.0080(5) 
C1 0.0232(7) 0.0198(7) 0.0286(7) 0.0017(6) 0.0038(5) 0.0069(6) 
C3 0.0271(7) 0.0335(8) 0.0371(8) 0.0084(7) 0.0048(6) 0.0038(6) 
C4 0.0320(8) 0.0447(9) 0.0512(10) 0.0217(8) 0.0143(7) 0.0065(7) 
C5 0.0595(10) 0.0480(10) 0.0430(10) 0.0227(8) 0.0277(8) 0.0229(9) 
C6 0.0742(11) 0.0343(9) 0.0323(8) 0.0073(7) 0.0204(8) 0.0175(8) 
C7 0.0449(9) 0.0235(8) 0.0321(8) 0.0043(6) 0.0109(6) 0.0082(7) 
C9 0.0289(7) 0.0226(7) 0.0261(7) -0.0015(6) 0.0034(6) -0.0033(6) 
C10 0.0252(7) 0.0299(8) 0.0311(7) -0.0046(6) 0.0036(6) -0.0006(6) 
C11 0.0329(8) 0.0253(7) 0.0341(8) -0.0007(6) -0.0014(6) 0.0023(6) 
C14 0.0262(7) 0.0200(7) 0.0256(7) -0.0052(5) 0.0023(5) -0.0027(5) 
C12 0.0383(8) 0.0246(7) 0.0288(7) 0.0034(6) 0.0023(6) -0.0036(6) 
C13 0.0275(7) 0.0252(7) 0.0284(7) -0.0042(6) 0.0054(6) -0.0057(6) 
C15 0.0278(7) 0.0234(8) 0.0297(7) -0.0021(6) 0.0054(6) 0.0001(6) 
C16 0.0283(7) 0.0230(8) 0.0300(8) 0.0057(6) 0.0071(6) 0.0022(6) 
C17 0.0260(7) 0.0188(7) 0.0255(7) 0.0064(5) 0.0040(5) 0.0027(5) 
C18 0.0311(8) 0.0266(7) 0.0298(7) -0.0033(6) 0.0049(6) 0.0000(6) 
C20 0.0274(8) 0.0310(8) 0.0350(8) 0.0046(6) 0.0107(6) 0.0026(6) 
C19 0.0270(8) 0.0317(8) 0.0384(8) -0.0012(6) 0.0057(6) -0.0049(6) 
C21 0.0331(8) 0.0243(7) 0.0287(7) 0.0002(6) 0.0069(6) 0.0039(6) 
C22 0.0256(7) 0.0188(7) 0.0314(7) 0.0040(6) 0.0031(6) 0.0005(6) 
 
_geom_special_details 
; 
 All esds (except the esd in the dihedral angle between two l.s. planes) 
 are estimated using the full covariance matrix.  The cell esds are taken 
 into account individually in the estimation of esds in distances, angles 
 and torsion angles; correlations between esds in cell parameters are only 
 used when they are defined by crystal symmetry.  An approximate (isotropic) 
 treatment of cell esds is used for estimating esds involving l.s. planes. 
; 
 
loop_ 
 _geom_bond_atom_site_label_1 
 _geom_bond_atom_site_label_2 
 _geom_bond_distance 
 _geom_bond_site_symmetry_2 
 _geom_bond_publ_flag 
O1 O1 0.000(2) 1 ? 
O1 C1 1.2663(15) . ? 
O2 O2 0.000(3) 1 ? 
O2 C1 1.2603(15) . ? 
N1 C15 1.4932(17) . ? 
N1 C16 1.5007(17) . ? 
N1 H1N1 1.037(16) . ? 
N1 H1N2 0.936(17) . ? 
C2 C7 1.3901(19) . ? 
C2 C3 1.392(2) . ? 
C2 C1 1.5069(18) . ? 
C1 O2 1.2603(15) 1 ? 
C1 O1 1.2663(15) 1 ? 
C3 C4 1.385(2) . ? 
C3 H3 0.977(16) . ? 
C4 C5 1.380(2) . ? 
C4 H4 0.981(18) . ? 
C5 C6 1.386(2) . ? 
C5 H5 1.009(18) . ? 
C6 C7 1.385(2) . ? 
C6 H6 0.998(19) . ? 
C7 H7 0.958(16) . ? 
C9 C10 1.3847(19) . ? 
C9 C14 1.3942(18) . ? 
C9 H9 0.969(14) . ? 
C10 C11 1.384(2) . ? 
C10 H10 0.965(15) . ? 
C11 C12 1.383(2) . ? 
C11 H11 0.968(16) . ? 
C14 C13 1.3881(18) . ? 
C14 C15 1.5048(18) . ? 
C12 C13 1.3861(19) . ? 
C12 H12 0.963(16) . ? 
C13 H13 0.984(14) . ? 
C15 H15A 0.980(14) . ? 
C15 H15B 0.980(16) . ? 
C16 C17 1.5024(18) . ? 
C16 H16A 0.963(16) . ? 
C16 H16B 0.985(15) . ? 
C17 C18 1.3888(19) . ? 
C17 C22 1.3914(18) . ? 
C18 C19 1.3843(19) . ? 
C18 H18 0.977(15) . ? 
C20 C21 1.383(2) . ? 
C20 C19 1.385(2) . ? 
C20 H20 1.005(15) . ? 
C19 H19 0.970(16) . ? 
C21 C22 1.3855(19) . ? 
C21 H21 0.969(15) . ? 
C22 H22 0.965(15) . ? 
 
loop_ 
 _geom_angle_atom_site_label_1 
 _geom_angle_atom_site_label_2 
 _geom_angle_atom_site_label_3 
 _geom_angle 
 _geom_angle_site_symmetry_1 
 _geom_angle_site_symmetry_3 
 _geom_angle_publ_flag 
O1 O1 C1 0(10) 1 . ? 
O2 O2 C1 0(10) 1 . ? 
C15 N1 C16 114.08(10) . . ? 
C15 N1 H1N1 111.5(9) . . ? 
C16 N1 H1N1 103.1(8) . . ? 
C15 N1 H1N2 109.8(9) . . ? 
C16 N1 H1N2 111.7(9) . . ? 
H1N1 N1 H1N2 106.4(12) . . ? 
C7 C2 C3 119.02(13) . . ? 
C7 C2 C1 119.89(12) . . ? 
C3 C2 C1 121.07(12) . . ? 
O2 C1 O2 0.00(9) 1 . ? 
O2 C1 O1 123.97(11) 1 . ? 
O2 C1 O1 123.97(11) . . ? 
O2 C1 O1 123.97(11) 1 1 ? 
O2 C1 O1 123.97(11) . 1 ? 
O1 C1 O1 0.00(9) . 1 ? 
O2 C1 C2 119.04(11) 1 . ? 
O2 C1 C2 119.04(11) . . ? 
O1 C1 C2 116.99(11) . . ? 
O1 C1 C2 116.99(11) 1 . ? 
C4 C3 C2 120.33(15) . . ? 
C4 C3 H3 120.8(9) . . ? 
C2 C3 H3 118.9(9) . . ? 
C5 C4 C3 120.10(15) . . ? 
C5 C4 H4 121.2(9) . . ? 
C3 C4 H4 118.7(10) . . ? 
C4 C5 C6 120.24(14) . . ? 
C4 C5 H5 120.0(10) . . ? 
C6 C5 H5 119.7(10) . . ? 
C7 C6 C5 119.62(16) . . ? 
C7 C6 H6 119.3(10) . . ? 
C5 C6 H6 121.1(10) . . ? 
C6 C7 C2 120.69(15) . . ? 
C6 C7 H7 121.6(9) . . ? 
C2 C7 H7 117.7(9) . . ? 
C10 C9 C14 120.35(12) . . ? 
C10 C9 H9 120.3(8) . . ? 
C14 C9 H9 119.3(8) . . ? 
C11 C10 C9 120.18(13) . . ? 
C11 C10 H10 120.6(8) . . ? 
C9 C10 H10 119.2(8) . . ? 
C12 C11 C10 119.79(13) . . ? 
C12 C11 H11 120.7(8) . . ? 
C10 C11 H11 119.5(8) . . ? 
C13 C14 C9 119.05(12) . . ? 
C13 C14 C15 120.87(11) . . ? 
C9 C14 C15 120.07(11) . . ? 
C11 C12 C13 120.20(13) . . ? 
C11 C12 H12 119.9(8) . . ? 
C13 C12 H12 119.8(9) . . ? 
C12 C13 C14 120.43(12) . . ? 
C12 C13 H13 120.0(8) . . ? 
C14 C13 H13 119.6(8) . . ? 
N1 C15 C14 111.21(10) . . ? 
N1 C15 H15A 107.4(7) . . ? 
C14 C15 H15A 111.6(7) . . ? 
N1 C15 H15B 106.1(8) . . ? 
C14 C15 H15B 111.2(8) . . ? 
H15A C15 H15B 109.1(11) . . ? 
N1 C16 C17 114.42(10) . . ? 
N1 C16 H16A 104.8(8) . . ? 
C17 C16 H16A 112.1(8) . . ? 
N1 C16 H16B 104.4(8) . . ? 
C17 C16 H16B 111.1(8) . . ? 
H16A C16 H16B 109.6(11) . . ? 
C18 C17 C22 118.69(12) . . ? 
C18 C17 C16 120.55(12) . . ? 
C22 C17 C16 120.74(12) . . ? 
C19 C18 C17 120.84(13) . . ? 
C19 C18 H18 120.4(8) . . ? 
C17 C18 H18 118.7(8) . . ? 
C21 C20 C19 119.87(12) . . ? 
C21 C20 H20 120.0(8) . . ? 
C19 C20 H20 120.2(8) . . ? 
C20 C19 C18 119.92(13) . . ? 
C20 C19 H19 120.0(9) . . ? 
C18 C19 H19 120.1(9) . . ? 
C20 C21 C22 120.05(13) . . ? 
C20 C21 H21 119.7(8) . . ? 
C22 C21 H21 120.3(8) . . ? 
C21 C22 C17 120.62(12) . . ? 
C21 C22 H22 120.6(8) . . ? 
C17 C22 H22 118.8(8) . . ? 
 
loop_ 
 _geom_hbond_atom_site_label_D 
 _geom_hbond_atom_site_label_H 
 _geom_hbond_atom_site_label_A 
 _geom_hbond_distance_DH 
 _geom_hbond_distance_HA 
 _geom_hbond_distance_DA 
 _geom_hbond_angle_DHA 
 _geom_hbond_site_symmetry_A 
N1 H1N1 O1  1.037(16) 1.632(17) 2.6520(14) 166.7(14) 1 
N1 H1N1 O2  1.037(16) 2.580(15) 3.2826(14) 124.6(11) 1 
N1 H1N2 O2  0.936(17) 1.823(17) 2.7440(14) 167.6(13) 2_645 
 
_diffrn_measured_fraction_theta_max    1.000 
_diffrn_reflns_theta_full              22.50 
_diffrn_measured_fraction_theta_full   1.000 
_refine_diff_density_max    0.139 
_refine_diff_density_min   -0.168 
_refine_diff_density_rms    0.030 
